# Supplementary material for: Chitosan-stabilized gold nanoparticles decorated with a thiodiacetic acid nanoprobe for selective detection of arsenic(iii) in rice and water samples
Source: Royal Society of Chemistry journal article supplement (doi:10.1039/d4ra04961f), 2024-01-01
Supplement: d4ra04961f1.pdf [file d4ra04961f1.pdf]

## Electronic Supporting Information

### **Chitosan-stabilized gold nanoparticles decorated with thiodiacetic acid nanoprobe for selective detection of arsenic(III) in rice and water samples**

Asmah Kuno,<sup>ab</sup> Nuryanee Hama,<sup>ab</sup> Panwadee Wattanasin<sup>a</sup> and Thitima Rujiralai<sup>\*ab</sup>

*<sup>a</sup>Center of Excellence for Innovation in Chemistry and Division of Physical Science, Faculty of Science, Prince of Songkla University, Songkhla, 90110, Thailand*

*<sup>b</sup>Analytical Chemistry and Environment Research Unit, Division of Science, Faculty of Science and Technology, Prince of Songkla University, Pattani, 94000, Thailand*

\* Corresponding author

*E-mail:* thitima.r@psu.ac.th (T. Rujiralai)

Thitima Rujiralai (ORCID 0000-0003-0891-0853)

**The calculation of LOD of CS/AuNPs@TDA probe**

The LOD of the CS/AuNPs@TDA probe was calculated by using the following equation:

$$LOD = 3.3\sigma/S$$

where  $\sigma$  is the standard deviation of the blank sample ( $n = 15$ ) and  $S$  is the slope of the linear calibration curve.<sup>1</sup>

**Preparation of blank solution**

The blank solution was prepared in 15 replicates. Each blank solution was performed by adding 250  $\mu\text{L}$  of DI water to 675  $\mu\text{L}$  of freshly diluted CS/AuNPs@TDA and 75  $\mu\text{L}$  of 5 mM Britton-Robinson buffer at pH 4.0 in a 1.5-mL Eppendorf tube. Then, the solution was heated in a heating block at 90 °C for 90 min and after being cooled to room temperature, the UV–vis spectrum of the blank solution was recorded from 400 to 800 nm.

**Preparation of the probe for the standard calibration curve**

The probe was prepared by spiking the standard solution of  $\text{As}^{3+}$  in the range of 0.01 to 5.00  $\text{mg L}^{-1}$  to 675  $\mu\text{L}$  of freshly diluted CS/AuNPs@TDA and 75  $\mu\text{L}$  of 5 mM Britton-Robinson buffer at pH 4.0 in a 1.5-mL Eppendorf tube. Each probe reacted at 90 °C for 90 min and after being cooled to room temperature, the UV–vis spectrum of the probe was recorded from 400 to 800 nm.

**The calculation of the LOD**

The absorbance value at 525 and 645 nm of each blank solution was demonstrated in Table S1. The calibration curve was linear in the range of 0.01 to 1.00  $\text{mg L}^{-1}$ , with a linear regression equation of  $y (A_{645}/A_{525}) = (0.7603 \pm 0.0436) x (\text{mg L}^{-1}) + (0.2361 \pm 0.0264)$  and an  $R^2$  of 0.9902.

**Table S1** The absorbance values at 525 and 645 nm of each blank solution

| Number of blank solutions | Absorbance at 525 nm ( $A_{525}$ ) | Absorbance at 645 nm ( $A_{645}$ ) | $A_{645}/A_{525}$ |
|---------------------------|------------------------------------|------------------------------------|-------------------|
| 1                         | 0.3641                             | 0.0823                             | 0.2260            |
| 2                         | 0.3613                             | 0.0810                             | 0.2242            |
| 3                         | 0.3610                             | 0.0807                             | 0.2235            |
| 4                         | 0.3595                             | 0.0817                             | 0.2273            |
| 5                         | 0.3625                             | 0.0822                             | 0.2268            |
| 6                         | 0.3636                             | 0.0810                             | 0.2228            |
| 7                         | 0.3630                             | 0.0814                             | 0.2242            |
| 8                         | 0.3606                             | 0.0805                             | 0.2232            |
| 9                         | 0.3626                             | 0.0816                             | 0.2250            |
| 10                        | 0.3618                             | 0.0815                             | 0.2253            |
| 11                        | 0.3619                             | 0.0815                             | 0.2252            |
| 12                        | 0.3624                             | 0.0806                             | 0.2224            |
| 13                        | 0.3677                             | 0.0829                             | 0.2255            |
| 14                        | 0.3662                             | 0.0825                             | 0.2253            |
| 15                        | 0.3649                             | 0.0818                             | 0.2242            |
|                           |                                    | <b>mean</b>                        | <b>0.2247</b>     |
|                           |                                    | <b><math>\sigma</math></b>         | <b>0.0014</b>     |

A standard deviation of the blank solution ( $\sigma$ ) was 0.0014 and a slope of the linear calibration curve ( $S$ ) was 0.7603.

$$LOD = \frac{3.3\sigma}{S}$$

$$LOD = \frac{3.3 \times 0.0014}{0.7603}$$

$$LOD = 0.0061 \text{ mg L}^{-1}$$

Reference

1. ICH, Q2B Validation of Analytical Procedures: Methodology, ICH-Q2B, 1996, 1–10,  
<https://www.fda.gov/media/71725/download>, accessed June 2024

### Job's plot

To determine the stoichiometry of the complex formation of CS/AuNPs@TDA with  $As^{3+}$ , the Job's plot for the absorbance after reaction was measured by keeping the sum of initial concentrations of  $As^{3+}$  and CS/AuNPs@TDA constant with a total volume of 1 mL in a 1.5-mL Eppendorf tube (125, 250, 375, 500, 625, 750, and 875  $\mu\text{L}$  of 4  $\text{mg L}^{-1}$  of  $As^{3+}$  and 875, 750, 625, 500, 375, 250, and 125  $\mu\text{L}$  of CS/AuNPs@TDA (pH 4.0)). The molar ratio of  $As^{3+}$  (

$X_M = \frac{[As^{3+}]}{[As^{3+}] + [CS/AuNPs@TDA]}$ ) is changed from 0 to 1, where  $X_M$  is a mole fraction of  $As^{3+}$ . Each solution was heated at 90 °C for 90 min and after that, it was cooled to room temperature. The spectrum was recorded by UV–vis spectrophotometer. Three repetitions of all measurements were carried out.

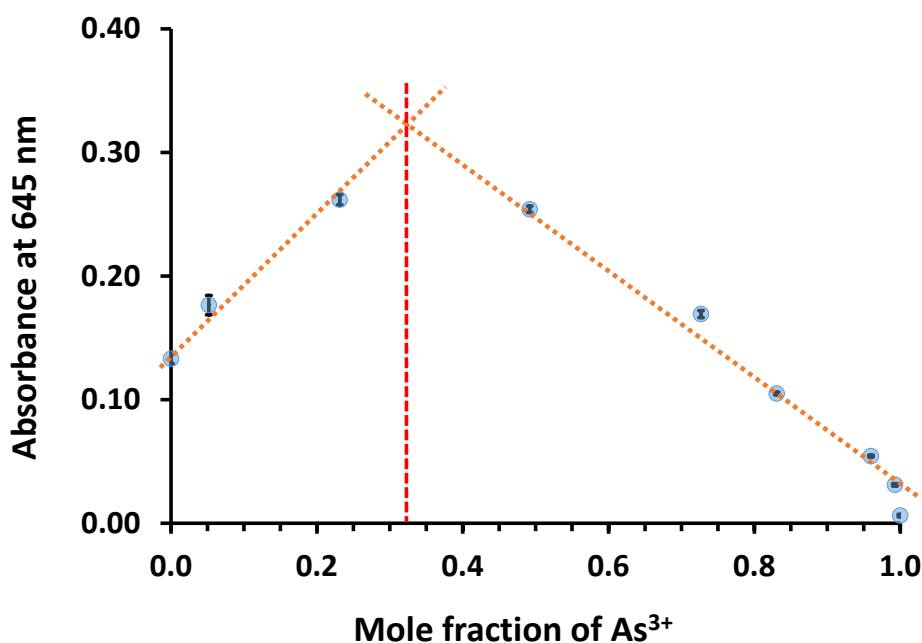

Fig. S1 Job's plot for the determination of the binding stoichiometry of  $As^{3+}$  and CS/AuNPs@TDA which absorbance is measured at 645 nm (aggregation state).

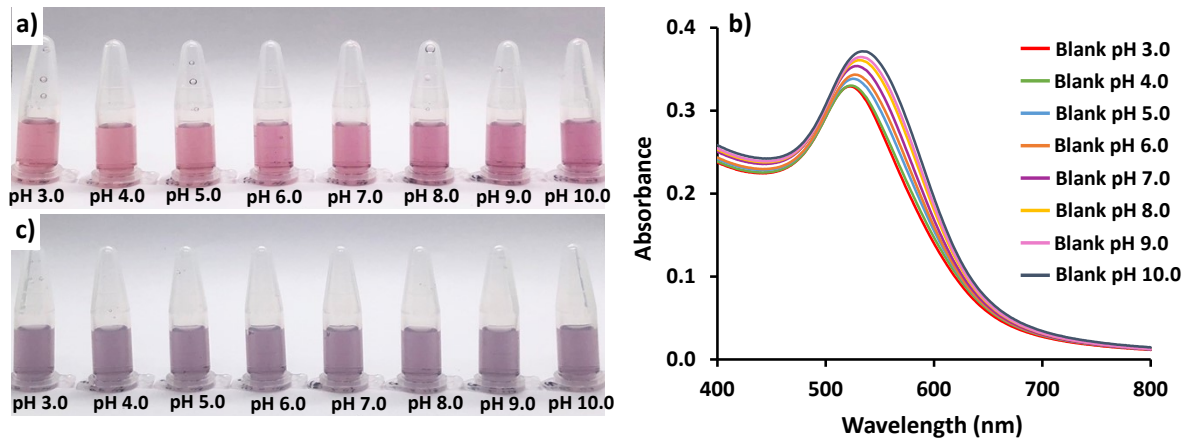

**Fig. S2** Effect of pH (3.0 – 10.0) of 5 mM Britton-Robinson buffer. (a) Photographs and (b) UV–vis spectra of CS/AuNPs@TDA in the absence of As<sup>3+</sup> (blank solution) at various pHs. (c) Photographs of the aggregated CS/AuNPs@TDA in the presence of 1.0 mg L<sup>-1</sup> As<sup>3+</sup> at various pHs.

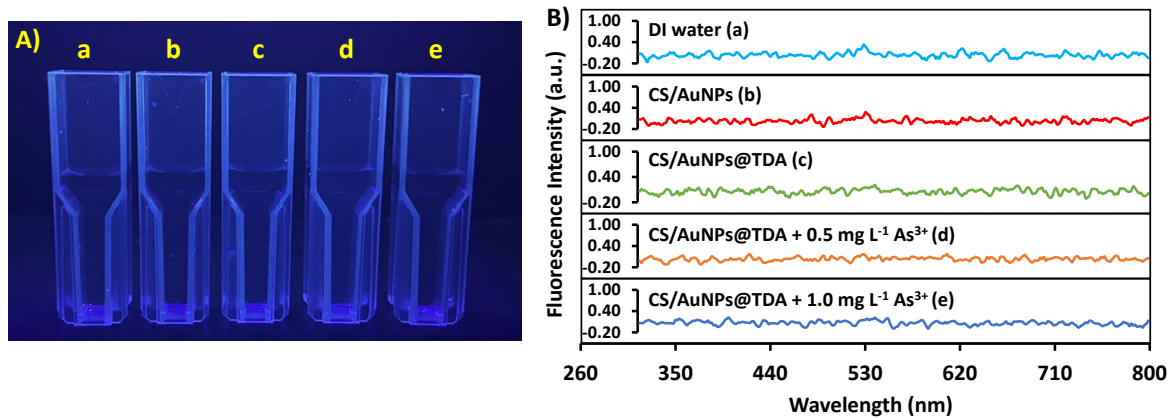

**Fig. S3** (A) Fluorescence photographs and (B) fluorescence spectra of (a) DI water, (b) CS/AuNPs, (c) CS/AuNPs@TDA, (d) CS/AuNPs@TDA with 0.5 mg L<sup>-1</sup> As<sup>3+</sup> and (e) CS/AuNPs@TDA with 1.0 mg L<sup>-1</sup> As<sup>3+</sup>.

**Table S2** Recoveries of As<sup>3+</sup> in rice and drinking water based on the developed CS/AuNPs@TDA and ICP–OES

| Sample   | Spiked<br>(mg L <sup>-1</sup> ) | CS/AuNPs@TDA (n = 3)                          |                 |         | ICP–OES detection <sup>c</sup> (n = 3)      |                 |            |
|----------|---------------------------------|-----------------------------------------------|-----------------|---------|---------------------------------------------|-----------------|------------|
|          |                                 | Found <sup>a,b</sup><br>(mg L <sup>-1</sup> ) | Recovery<br>(%) | RSD (%) | Found <sup>a</sup><br>(mg L <sup>-1</sup> ) | Recovery<br>(%) | RSD<br>(%) |
| Rice     | 0.00                            | Not detected                                  | –               | –       | Not detected                                | –               | –          |
| sample 1 | 0.05                            | 0.043±0.008                                   | 101.15          | 1.86    | 0.054±0.004                                 | 102.30          | 0.14       |
|          | 0.20                            | 0.203±0.007                                   | 102.98          | 2.89    | 0.206±0.001                                 | 103.60          | 1.62       |
|          | 0.50                            | 0.511±0.018                                   | 102.69          | 2.94    | 0.483±0.054                                 | 103.25          | 0.48       |
| Rice     | 0.00                            | Not detected                                  | –               | –       | 0.007±0.002                                 | –               | –          |
| sample 2 | 0.05                            | 0.039±0.004                                   | 91.27           | 0.72    | 0.057±0.004                                 | 91.54           | 1.45       |
|          | 0.20                            | 0.195±0.009                                   | 102.64          | 1.45    | 0.207±0.014                                 | 103.42          | 1.68       |
|          | 0.50                            | 0.494±0.041                                   | 104.24          | 1.82    | 0.533±0.032                                 | 101.60          | 0.42       |
| Drinking | 0.00                            | Not detected                                  | –               | –       | Not detected                                | –               | –          |
| water 1  | 0.05                            | 0.045±0.008                                   | 99.18           | 2.91    | 0.048±0.004                                 | 101.50          | 2.09       |
|          | 0.20                            | 0.188±0.006                                   | 93.93           | 2.17    | 0.188±0.004                                 | 94.08           | 1.73       |
|          | 0.50                            | 0.468±0.002                                   | 93.54           | 0.34    | 0.470±0.001                                 | 93.93           | 0.22       |
| Drinking | 0.00                            | Not detected                                  | –               | –       | Not detected                                | –               | –          |
| water 2  | 0.05                            | 0.045±0.007                                   | 96.40           | 1.20    | 0.049±0.001                                 | 95.70           | 0.63       |
|          | 0.20                            | 0.191±0.006                                   | 95.12           | 1.30    | 0.186±0.008                                 | 94.92           | 2.87       |
|          | 0.50                            | 0.471±0.002                                   | 94.06           | 0.52    | 0.473±0.004                                 | 94.66           | 0.38       |

<sup>a</sup>Found ± standard deviation; <sup>b</sup>LOQ of the developed method was 0.018 mg L<sup>-1</sup>; <sup>c</sup>LOQ of the ICP–OES method was 15.76 ng L<sup>-1</sup>.

**Table S3** Recoveries of As<sup>3+</sup> in environmental water samples based on the developed CS/AuNPs@TDA and ICP–OES

| Sample | Spiked<br>(mg L <sup>-1</sup> ) | CS/AuNPs@TDA (n = 3)                          |                 |         | ICP–OES detection <sup>c</sup> (n = 3)      |                 |            |
|--------|---------------------------------|-----------------------------------------------|-----------------|---------|---------------------------------------------|-----------------|------------|
|        |                                 | Found <sup>a,b</sup><br>(mg L <sup>-1</sup> ) | Recovery<br>(%) | RSD (%) | Found <sup>a</sup><br>(mg L <sup>-1</sup> ) | Recovery<br>(%) | RSD<br>(%) |
| W1     | 0.00                            | Not detected                                  | –               | –       | 0.063±0.001                                 | –               | –          |
|        | 0.05                            | 0.048±0.002                                   | 101.92          | 0.78    | 0.113±0.001                                 | 102.74          | 0.78       |
|        | 0.20                            | 0.189±0.009                                   | 93.36           | 0.52    | 0.251±0.001                                 | 94.10           | 0.97       |
|        | 0.50                            | 0.461±0.016                                   | 92.62           | 2.89    | 0.534±0.002                                 | 94.31           | 0.52       |
| W2     | 0.00                            | Not detected                                  | –               | –       | 0.006±0.001                                 | –               | –          |
|        | 0.05                            | 0.044±0.005                                   | 102.98          | 2.99    | 0.058±0.001                                 | 104.00          | 1.92       |
|        | 0.20                            | 0.198±0.009                                   | 105.74          | 2.10    | 0.215±0.004                                 | 104.33          | 1.63       |
|        | 0.50                            | 0.457±0.016                                   | 93.02           | 2.92    | 0.467±0.003                                 | 92.17           | 0.74       |
| W3     | 0.00                            | <LOQ <sup>b</sup><br>(0.007±0.002)            | –               | –       | 0.008±0.004                                 | –               | –          |
|        | 0.05                            | 0.052±0.001                                   | 88.22           | 1.95    | 0.052±0.003                                 | 87.33           | 2.32       |
|        | 0.20                            | 0.197±0.011                                   | 97.64           | 0.25    | 0.201±0.004                                 | 98.88           | 0.89       |
|        | 0.50                            | 0.467±0.008                                   | 92.00           | 1.26    | 0.459±0.002                                 | 90.17           | 1.31       |

W1: Water from abandoned public shallow well; W2: Water from Huai Nong Ped creek; W3: Water from an abandoned tin mine; <sup>a</sup>Found ± standard deviation; <sup>b</sup>LOQ of the developed method was 0.018 mg L<sup>-1</sup>; <sup>c</sup>LOQ of the ICP–OES method was 15.76 ng L<sup>-1</sup>.
